# Supplementary material
Source: PubMed Central journal article supplement (PMC5031239)
Supplement: NIHMS813552-supplement-1.pdf [file NIHMS813552-supplement-1.pdf]

Supporting Table 1. Fatty acid composition within free fatty acids (FFA)

| Lipids                             | Control (n=50) | NAFL (n=25)   | NASH (n=50)    |
|------------------------------------|----------------|---------------|----------------|
| Myristic acid (14:0)               | 4.61 ± 0.22    | 4.12 ± 0.36   | 4.56 ± 0.28    |
| Pentadecanoic acid (15:0)          | 0.62 ± 0.04    | 0.59 ± 0.08   | 0.6 ± 0.04     |
| Palmitic acid (16:0)               | 27.21 ± 0.32   | 27.76 ± 0.43  | 26.84 ± 0.37   |
| Stearic acid (18:0)                | 13.73 ± 0.49   | 12.64 ± 0.52  | 12.85 ± 0.46   |
| Arachidic acid (20:0)              | 0.35 ± 0.03    | 0.26 ± 0.04   | 0.29 ± 0.03    |
| Behenic acid (22:0)                | 0.17 ± 0.01    | 0.13 ± 0.02   | 0.15 ± 0.01    |
| Lignoceric acid (24:0)             | 0.21 ± 0.02    | 0.2 ± 0.03    | 0.19 ± 0.02    |
| Myristoleic acid (14:1n5)          | 0.28 ± 0.02    | 0.25 ± 0.02   | 0.29 ± 0.02    |
| Palmitoleic acid (16:1n7)          | 2.55 ± 0.15    | 2.9 ± 0.2     | 3.12 ± 0.21*   |
| Vaccenic acid (18:1n7)             | 1.75 ± 0.05    | 2.01 ± 0.08** | 2.06 ± 0.07**  |
| Oleic acid (18:1n9)                | 29.23 ± 0.66   | 31.11 ± 0.9   | 30.65 ± 0.66   |
| Eicosenoic acid (20:1n9)           | 0.32 ± 0.01    | 0.36 ± 0.02*  | 0.39 ± 0.02*** |
| Mead acid (20:3n9)                 | 0.06 ± 0.01    | 0.06 ± 0.01   | 0.06 ± 0.01    |
| Erucic acid (22:1n9)               | 0.19 ± 0.03    | 0.31 ± 0.2    | 0.36 ± 0.2     |
| Nervonic acid (24:1n9)             | 0.05 ± 0.004   | 0.04 ± 0.003* | 0.04 ± 0.003*  |
| Linoleic acid (18:2n6)             | 15.32 ± 0.44   | 14.01 ± 0.53  | 14.25 ± 0.41   |
| γ-linolenic acid (18:3n6)          | 0.12 ± 0.01    | 0.15 ± 0.01   | 0.16 ± 0.01*   |
| Eicosadienoic acid (20:2n6)        | 0.28 ± 0.01    | 0.28 ± 0.02   | 0.28 ± 0.01    |
| Homo-γ-linolenic acid (20:3n6)     | 0.21 ± 0.01    | 0.23 ± 0.01   | 0.24 ± 0.01    |
| Arachidonic acid (20:4n6)          | 0.77 ± 0.03    | 0.79 ± 0.06   | 0.84 ± 0.07    |
| Docosadienoic acid (22:2n6)        | 0.03 ± 0.002   | 0.03 ± 0.003  | 0.03 ± 0.005   |
| Adrenic acid (22:4n6)              | 0.18 ± 0.01    | 0.18 ± 0.01   | 0.18 ± 0.01    |
| Docosapentaenoic acid (22:5n6)     | 0.05 ± 0.004   | 0.04 ± 0.004  | 0.05 ± 0.005   |
| α-linolenic acid (18:3n3)          | 1.08 ± 0.06    | 0.87 ± 0.07*  | 0.9 ± 0.06*    |
| Stearidonic acid (18:4n3)          | 0.11 ± 0.01    | 0.08 ± 0.02   | 0.11 ± 0.02    |
| Eicsoatetraenoic acid (20:4n3)     | 0.03 ± 0.004   | 0.03 ± 0.003  | 0.02 ± 0.002   |
| Eicosapentaenoic acid (20:5n3)     | 0.08 ± 0.01    | 0.1 ± 0.02    | 0.09 ± 0.01    |
| Docosapentaenoic acid (22:5n3)     | 0.16 ± 0.01    | 0.18 ± 0.02   | 0.16 ± 0.01    |
| Docosahexaenoic acid (22:6n3)      | 0.38 ± 0.03    | 0.39 ± 0.07   | 0.37 ± 0.05    |
| Saturated fatty acid (%SFA)        | 46.9 ± 0.98    | 45.7 ± 1.23   | 45.48 ± 1.05   |
| Monounsaturated fatty acid (%MUFA) | 34.35 ± 0.79   | 36.96 ± 1.02  | 36.9 ± 0.8*    |
| n7 MUFA (%n7)                      | 4.3 ± 0.19     | 4.92 ± 0.27   | 5.17 ± 0.26**  |
| n9 MUFA (%n9)                      | 29.84 ± 0.67   | 31.85 ± 0.86  | 31.48 ± 0.62   |
| Polyunsaturated fatty acid (%PUFA) | 18.75 ± 0.52   | 17.34 ± 0.55  | 17.63 ± 0.5    |
| n3 PUFA (%n3)                      | 1.8 ± 0.1      | 1.61 ± 0.14   | 1.61 ± 0.1     |
| n6 PUFA (%n6)                      | 16.9 ± 0.46    | 15.68 ± 0.5   | 15.97 ± 0.44   |
| Ratio of n6/n3 PUFA                | 10.84 ± 0.73   | 13.14 ± 2.38  | 12.14 ± 0.96   |

Data are shown in mol%, Mean ± S.E.M.,

\* =  $p < 0.05$ , \*\* =  $p < 0.01$ , \*\*\* =  $p < 0.001$  vs normal
